# Supplementary material
Source: HighWire-hosted journal article supplement (https://ard.bmj.com/content/80/12/1638)
Supplement: inline-supplementary-material-1 [file inline-supplementary-material-1.pdf]

## Supplemental material

Table 1: Clinical examination pre and post lockdown in relation to physical therapy

| group 1: physiotherapy before and stop during lockdown (n=30) |               |    |               |    |              |    |         |
|---------------------------------------------------------------|---------------|----|---------------|----|--------------|----|---------|
|                                                               | pre lockdown  |    | post lockdown |    | difference   |    | p       |
|                                                               | mean          | SD | mean          | SD | mean         | SD |         |
| <b>BASMI</b>                                                  |               |    |               |    |              |    |         |
| Tragus-to-wall (cm)                                           | 11,2 ± 1,29   |    | 11,2 ± 0,84   |    | 0,0 ± 1,46   |    | 0,919   |
| Modified Shöber (cm)                                          | 14,2 ± 0,87   |    | 14,5 ± 1,02   |    | 0,4 ± 0,98   |    | 0,035   |
| Cervical rotation left (°)                                    | 80,0 ± 8,75   |    | 80,1 ± 12,65  |    | 0,1 ± 12,57  |    | 0,956   |
| Cervical rotation right (°)                                   | 79,5 ± 10,50  |    | 79,7 ± 13,56  |    | 0,2 ± 14,00  |    | 0,94    |
| Lumbar flexion left (cm)                                      | 18,0 ± 4,08   |    | 17,8 ± 4,24   |    | -0,1 ± 3,25  |    | 0,811   |
| Lumbar flexion right (cm)                                     | 17,8 ± 3,71   |    | 17,8 ± 4,14   |    | 0,0 ± 3,21   |    | 0,952   |
| Intermalleolar distance (cm)                                  | 116,8 ± 16,82 |    | 112,2 ± 15,76 |    | -4,6 ± 12,00 |    | 0,058   |
| Chest expansion (cm)                                          | 6,4 ± 1,73    |    | 4,6 ± 1,38    |    | -1,8 ± 1,95  |    | ≤0,0001 |

  

| group 2: no physiotherapy before lockdown (n=32) |               |    |               |    |              |    |              |
|--------------------------------------------------|---------------|----|---------------|----|--------------|----|--------------|
|                                                  | pre lockdown  |    | post lockdown |    | difference   |    | p            |
|                                                  | mean          | SD | mean          | SD | mean         | SD |              |
| <b>BASMI</b>                                     |               |    |               |    |              |    |              |
| Tragus-to-wall (cm)                              | 11,2 ± 1,08   |    | 11,8 ± 1,23   |    | 0,7 ± 1,17   |    | <b>0,004</b> |
| Modified Shöber (cm)                             | 13,8 ± 1,05   |    | 14,2 ± 1,09   |    | 0,3 ± 1,01   |    | 0,061        |
| Cervical rotation left (°)                       | 78,6 ± 12,12  |    | 78,3 ± 13,02  |    | -0,3 ± 10,77 |    | 0,895        |
| Cervical rotation right (°)                      | 78,4 ± 12,74  |    | 74,5 ± 19,61  |    | -3,9 ± 21,28 |    | 0,315        |
| Lumbar flexion left (cm)                         | 17,7 ± 5,28   |    | 17,8 ± 5,79   |    | 0,1 ± 2,54   |    | 0,89         |
| Lumbar flexion right (cm)                        | 18,5 ± 4,49   |    | 20,3 ± 18,09  |    | 1,9 ± 16,74  |    | 0,533        |
| Intermalleolar distance (cm)                     | 114,0 ± 14,83 |    | 105,6 ± 31,16 |    | -8,4 ± 28,55 |    | 0,12         |
| Chest expansion (cm)                             | 5,6 ± 1,82    |    | 4,2 ± 1,69    |    | -1,4 ± 1,64  |    | ≤0,0001      |

BASMI and Chest Expansion values before and immediately after lockdown. The group was split based whether or not they had physical therapy before the lockdown. Paired T-tests were used for comparison and with Bonferroni correction the level of significance was  $\alpha=0.006$ .

In group 2, the Tragus-to Wall measurement displayed a small yet significant difference pre and post lockdown but for the overall analysis, we focused on the combined significant findings in both group 1 and 2.

**Table 2: Patient demographics in the lockdown SpA cohort and the BeGiant control group**

|                                        | BeGiant cohort (n=202) | Lockdown SpA cohort (n=65) | p     |
|----------------------------------------|------------------------|----------------------------|-------|
| Age, years, mean $\pm$ SD              | 39,8 $\pm$ 11,42       | 39,7 $\pm$ 11,78           | 0,958 |
| Gender (M/F)                           | 106/96                 | 37/28                      |       |
| Body weight, kg, mean $\pm$ SD         | 75,1 $\pm$ 14,62       | 73,0 $\pm$ 13,26           | 0,317 |
| Body height, cm, mean $\pm$ SD         | 173,0 $\pm$ 9,15       | 174,6 $\pm$ 8,88           | 0,256 |
| BMI, kg/m <sup>2</sup> , mean $\pm$ SD | 25,1 $\pm$ 4,41        | 23,8 $\pm$ 3,46            | 0,044 |
| Disease duration, years, mean $\pm$ SD | 6,2 $\pm$ 5,26         | 6,1 $\pm$ 6,13             | 0,865 |
| Symptom duration, years, mean $\pm$ SD | 9,5 $\pm$ 8,24         | 10,7 $\pm$ 9,39            | 0,31  |
| CRP, mg/L, , mean $\pm$ SD             | 3,4 $\pm$ 3,96         | 3,1 $\pm$ 3,72             | 0,712 |
| ESR, mm/h, , mean $\pm$ SD             | 8,6 $\pm$ 8,06         | 8,5 $\pm$ 7,03             | 0,982 |
| Tender/swollen joint count (%)         | 18,9 / 4,5             | 19,6 / 1,50                |       |
| Current NSAID use index (%)            | 22,3 $\pm$ 36,4        | 36,7 $\pm$ 47,08           |       |
| Current DMARD's use (%)                | 15,3                   | 6,1                        |       |
| Current biologicals use (%)            | 34,7                   | 40                         |       |
| BASMI total                            | 2,1 $\pm$ 0,88         | 1,9 $\pm$ 0,85             | 0,063 |
| BASDAI total                           | 3,3 $\pm$ 2,25         | 3,1 $\pm$ 1,95             | 0,543 |
| BASFI total                            | 2,1 $\pm$ 2,00         | 1,9 $\pm$ 1,83             | 0,41  |
| ASDAS total                            | 1,9 $\pm$ 0,92         | 2,0 $\pm$ 0,73             | 0,832 |

N=number of patients, SD= standard deviation, M= male, F= Female, BMI= body mass index, CRP= C-reactive protein, ESR= erythrocyte sedimentation rate

**The online questionnaire : INFLUENCE OF COVID-19 LOCKDOWN ON PHYSICAL CONDITION.****1. Questions regarding physical therapy and exercise therapy**

Before lockdown I received physical therapy yes / no

I received therapy regularly / irregularly, based on existing complaints

Treatment frequency

- 1x/month
- 2x/month
- 1x/week
- 2x/week
- 3x/week
- 5x/week

Which type of therapy did you receive ?  
(multiple answers possible)

- massage therapy
- electrotherapy
- mobilization/ manipulation
- exercise therapy
- other : .....

Before lockdown I exercised at home yes / no

I exercised regularly / irregularly

Frequency of exercises

- 1x/month
- 2x/month
- 1x/week
- 2x/week
- 3x/week
- 5x/week

I used an exercise program

- composed by myself
- composed by my physical therapist
- from an online platform

During lockdown

- I still visit my physical therapist
- I can't visit my physical therapist anymore
- I receive digital guidance from my PT
- not applicable

Since ...../...../.....

During lockdown

- I exercise at home by myself, like before
- I now exercise at home by myself
- I don't exercise

During lockdown, I use an exercise program

- composed by myself
- composed by my physical therapist
- from an online platform

**2. Questions regarding sports activities**

Before lockdown I performed sports activities yes / no

I performed my sports  
(multiple answers possible)

- alone
- with friends
- in a sportsclub
- with a patient group

Which sport(s) did you practice ?

.....  
.....  
.....

Minutes per practice  
Times/month

.....  
.....

During lockdown

- I can still practice my sport
- I can't practice my sport anymore, but I  
perform a different sports activity
- I don't practice sports (anymore)
- I started practicing sports

During lockdown, I now

- walk
- run
- bike
- other: .....

Minutes per practice  
Times/month

.....  
.....

I use an activity monitor or a pedometer yes / no

Are you willing to share the data from your activity monitor or pedometer ? yes / no

**3. Work related questions**

Before lockdown I performed a paid job yes / no

My job consisted

- mainly out of manual labor (> 60%)
- mainly out of mental work (>60%)
- a combination of manual and mental work

I worked

- full-time
- part-time because of my rheumatic disease
- part-time because of other health condition
- part-time because of other reasons

My job situation was

- officer
- worker
- clerk
- self employed

- independent professionals  
 other: .....
- During lockdown
   
 I can keep working as usual
   
 I can work from home now
   
 I can't work anymore
   
 not applicable
- Now that I working at home
   
 I stand more than usual
   
 I sit more than usual
   
 I move around more than usual
- Working at home
   
 I can do this as ergonomical as at the office  
 (e.g. office chair and desk)
   
 I can do this less ergonomical than at the  
 office (e.g. kitchen chair and table)
- 4. Questions regarding medication use**
- During the lockdown, I changed my medication use
   
 yes, because of the COVID-19 pandemic
   
 yes, but not linked to the COVID-19  
 pandemic
   
 not applicable
- During lockdown my use of NSAID's was
   
 unchanged
   
 increased
   
 diminished
   
 stopped
   
 not applicable
- The NSAID's I take are
   
 aceclofenac
   
 celecoxib
   
 diclofenac
   
 etoricoxib
   
 ibuprofen
   
 indomethacine
   
 meloxicam
   
 nabumeton
   
 naproxen
   
 piroxicam
   
 proglumethacine
   
 tenoxicam
   
 other: .....
- NSAID dosis
   
 <1day/week
   
 1-3days/week
   
 3-5days/week
   
 >5days/week
   
 daily

|                                              |                                                                                                                                                                                                 |
|----------------------------------------------|-------------------------------------------------------------------------------------------------------------------------------------------------------------------------------------------------|
| Average daily dosis                          | ..... mg                                                                                                                                                                                        |
| Start date                                   | ...../...../.....                                                                                                                                                                               |
| Stop date                                    | ...../...../.....                                                                                                                                                                               |
| During the lockdown my use of analgetics was | <input type="checkbox"/> unchanged<br><input type="checkbox"/> increased<br><input type="checkbox"/> diminished<br><input type="checkbox"/> stopped<br><input type="checkbox"/> not applicable  |
| The analgetics I take are                    | <input type="checkbox"/> paracetamol<br><input type="checkbox"/> tramadol<br><input type="checkbox"/> other: .....                                                                              |
| analgetics dosis                             | <input type="checkbox"/> <1day/week<br><input type="checkbox"/> 1-3days/week<br><input type="checkbox"/> 3-5days/week<br><input type="checkbox"/> >5days/week<br><input type="checkbox"/> daily |
| Average daily dosis                          | ..... mg                                                                                                                                                                                        |
| Start date                                   | ...../...../.....                                                                                                                                                                               |
| Stop date                                    | ...../...../.....                                                                                                                                                                               |
| During the lockdown my use of corticoids was | <input type="checkbox"/> unchanged<br><input type="checkbox"/> increased<br><input type="checkbox"/> diminished<br><input type="checkbox"/> stopped<br><input type="checkbox"/> not applicable  |
| The glucocorticoids I take are               | <input type="checkbox"/> methylprednisolone<br><input type="checkbox"/> prednisolone<br><input type="checkbox"/> other: .....                                                                   |
| The glucocorticoids dosis                    | <input type="checkbox"/> <1day/week<br><input type="checkbox"/> 1-3days/week<br><input type="checkbox"/> 3-5days/week<br><input type="checkbox"/> >5days/week<br><input type="checkbox"/> daily |
| Average daily dosis                          | ..... mg                                                                                                                                                                                        |
| Start date                                   | ...../...../.....                                                                                                                                                                               |
| Stop date                                    | ...../...../.....                                                                                                                                                                               |
| During lockdown my use of DMARD's was        | <input type="checkbox"/> unchanged<br><input type="checkbox"/> increased<br><input type="checkbox"/> diminished<br><input type="checkbox"/> stopped<br><input type="checkbox"/> not applicable  |

- The DMARD's I take are
- leflunomide
  - methotrexate
  - sulfasalazine
  - other: .....
- DMARD's dosis
- <1day/week
  - 1-3days/week
  - 3-5days/week
  - >5days/week
  - daily
- daily or weekly dosis
- ..... mg/day or ..... mg/week
- During the lockdown my use of biologicals was
- unchanged
  - increased
  - diminished
  - stopped
  - not applicable
- The biologicals I take are
- adalimumab
  - certolizumab-pegol
  - etanercept
  - golimumab
  - infliximab
  - secukinumab
  - other: .....

### 5. Questions regarding your health perception

How would you describe your current general health compared to before lockdown ?

- much better now
- a little better now
- about the same
- a little worse now
- much worse now

How would you describe your current morning stiffness compared to before lockdown ?

- much better now
- a little better now
- about the same
- a little worse now
- much worse now

How would you describe your current joint stiffness and stiffness in the back now compared to before lockdown ?

- much better now
- a little better now
- about the same
- a little worse now
- much worse now

How would you describe the hand-floor distance when you bend over with straight legs ?

- much better now
- a little better now
- about the same
- a little worse now
- much worse now

How would you describe your current muscle strength compared to before lockdown ?

- much better now
- a little better now
- about the same
- a little worse now
- much worse now

How would you describe your current general physical fitness compared to before lockdown ?

- much better now
- a little better now
- about the same
- a little worse now
- much worse now

#### 6. Questions regarding perceiving covid-19 symptoms

Do you suspect you had COVID-19 infection symptoms during lockdown ?      yes / no

Which symptoms did you experience ?

- fever
- shortness of breath
- dry cough
- pain in chest area
- muscle pain
- other: .....

**Are you willing to visit the hospital after the lockdown for a short visit to evaluate the mobility of your joints and spine ?**      yes / no
